# Supplementary material for: Employment of electrostatic interactions for amperometric detection of carbon nanoparticles in a FIA system
Source: Royal Society of Chemistry journal article supplement (doi:10.1039/c6an00752j), 2016-01-01
Supplement: c6an00752j1.pdf [file c6an00752j1.pdf]

## Supporting Information

### **Employment of electrostatic interactions for an amperometric detection of carbon nanoparticles in a FIA system**

D. Ogończyk<sup>a,\*</sup>, M. Gocyla<sup>a,b</sup> and M. Opallo<sup>a,\*</sup>

<sup>a</sup> *Institute of Physical Chemistry, Polish Academy of Sciences, Kasprzaka, 44/52, 01-224, Warsaw, Poland*

<sup>b</sup> *Faculty of Chemistry, Warsaw University of Technology, Noakowskiego 3, 00-664 Warsaw, Poland*

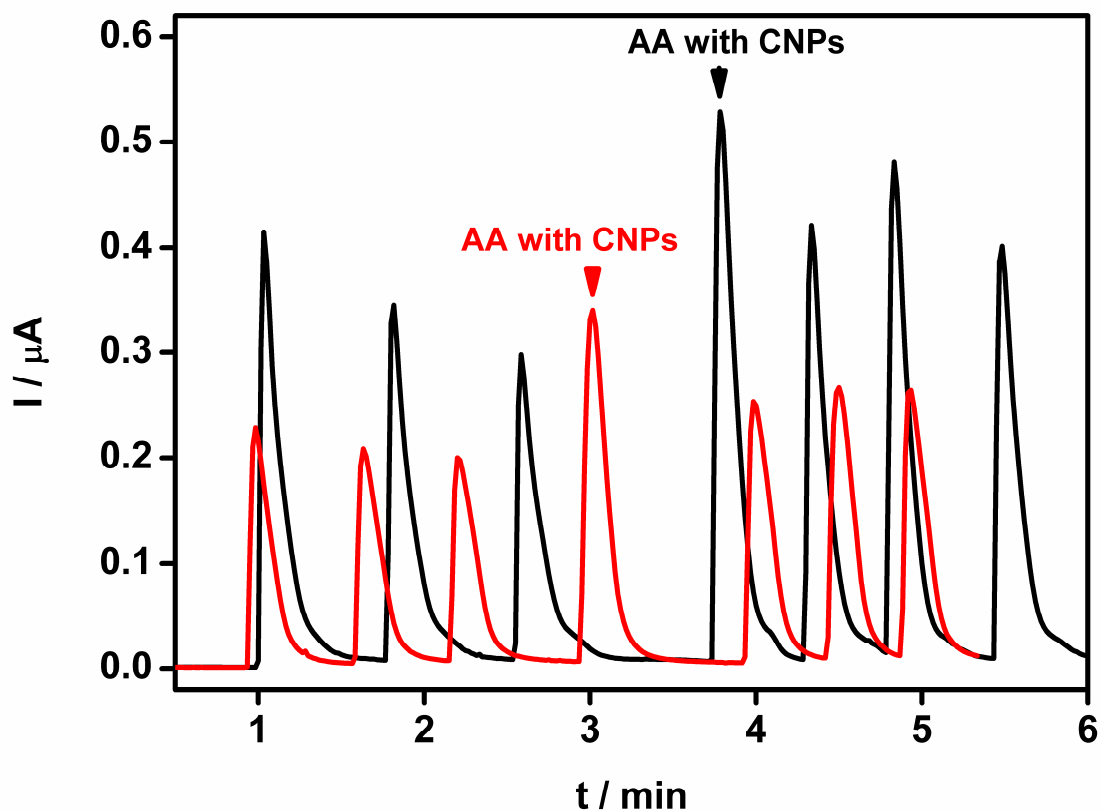

**Fig.SI\_1** Chronoamperometry of 1 mM AA electrooxidation performed with the use of the FIA system<sup>9</sup> at 0.2 V in H<sub>2</sub>O but not in NaH<sub>2</sub>PO<sub>4</sub> with the total flow rate fixed at 3 mL min<sup>-1</sup> for samples with or without the addition of 1 mg mL<sup>-1</sup> **CNPs aqueous suspension**. The sequence of the two series (black and red) was as follows: (i) three injections of AA and (ii) one injection of AA with CNPs and (iii) three injections of AA.

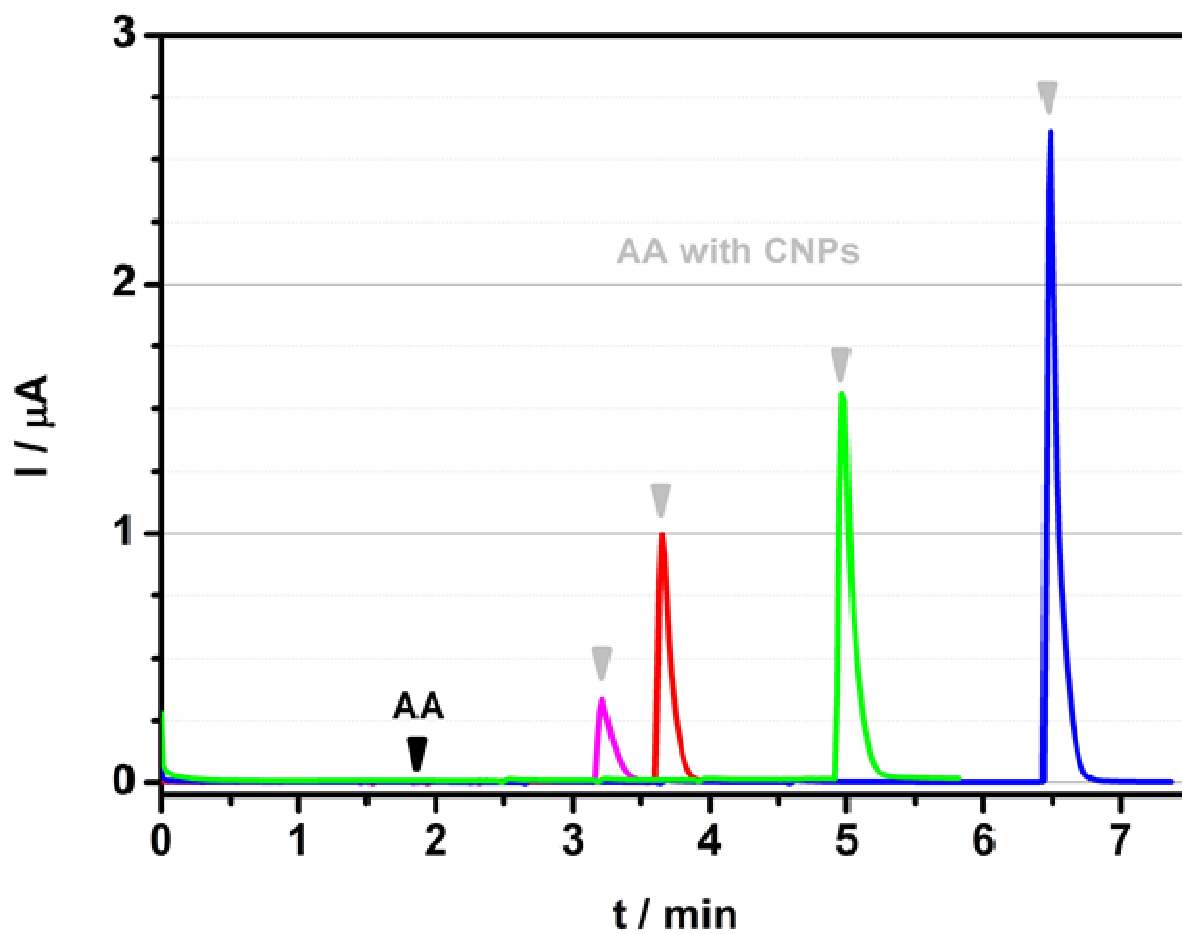

**Fig.SI\_2** Chronoamperometry of 1 mM AA electrooxidation performed with the use of FIA system<sup>9</sup> at 0.2 V in 25 mM NaH<sub>2</sub>PO<sub>4</sub> with the total flow rate fixed at 3 mL min<sup>-1</sup> for samples with or without the addition of 1 mg mL<sup>-1</sup> **CNPs aqueous suspension**. The sequence of the four series (pink, red, green and blue) was as follows: (i) three injections of 1 mM AA and (ii) one injection of AA with CNPs.

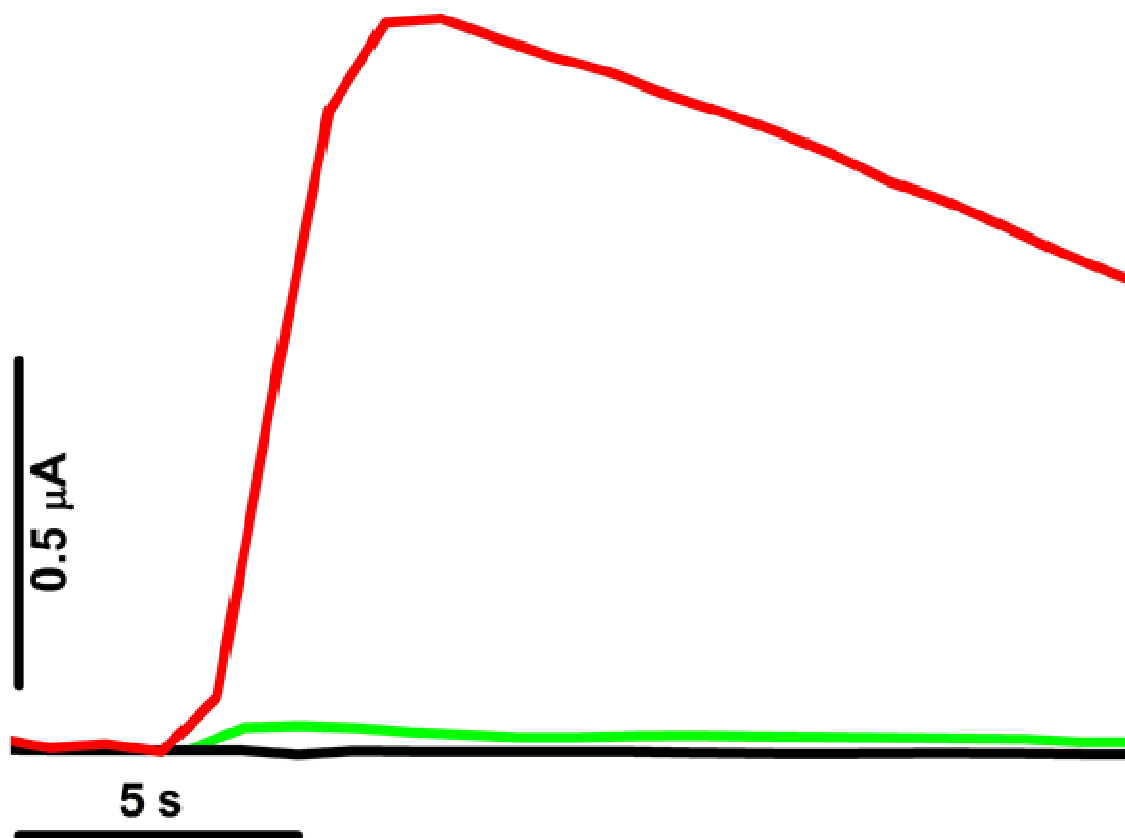

**Fig.SI\_3** Chronoamperometry of 20 mM deoxygenated solution of AA performed with the use of the FIA system (Fig.7B) at 0.2 V in 200 mM NaH<sub>2</sub>PO<sub>4</sub> (pH 4.6) with the total flow rate fixed at 6 mL min<sup>-1</sup> for samples with addition of 0.001 (black), 0.01 (green) and 0.1 (red) mg mL<sup>-1</sup> CNPs suspension in water.

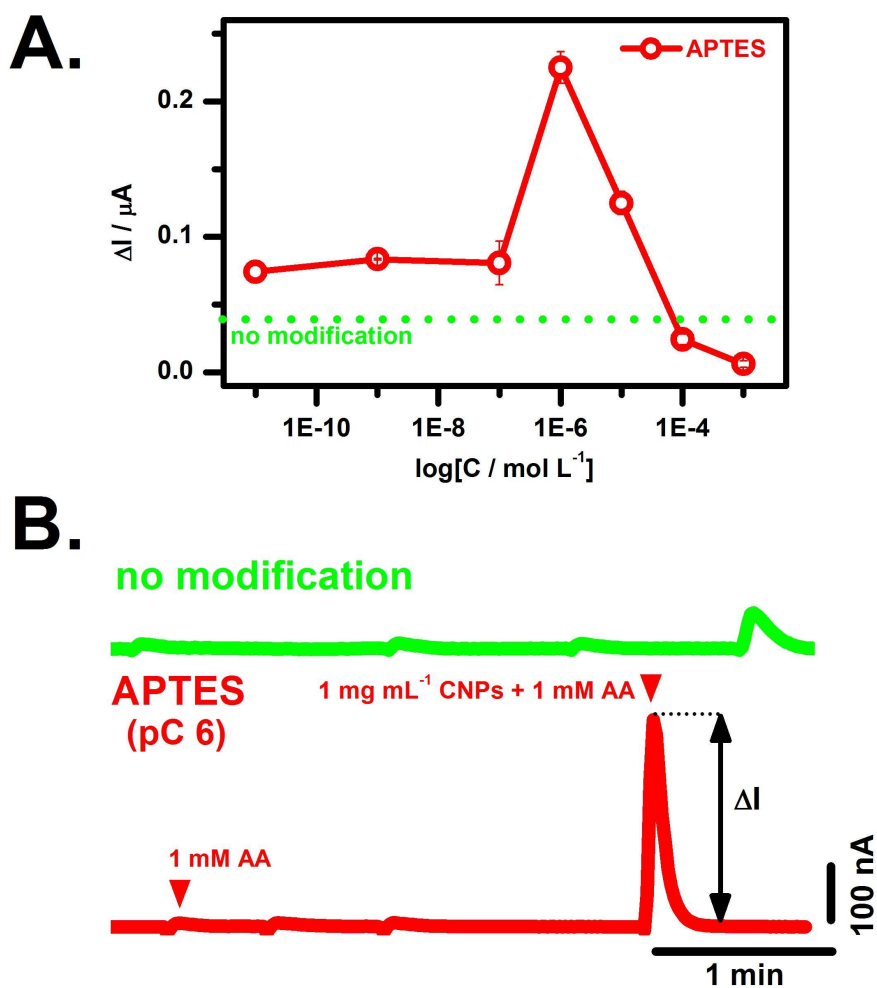

**Fig.SI\_4. (A)** Optimization of the concentration of APTES solution (red) used for ITO modification. Baseline-corrected current ( $\Delta I$ ) of electrooxidation of 1 mM AA in 25 mM NaH<sub>2</sub>PO<sub>4</sub> in the presence of 1 mg mL<sup>-1</sup> CNPs in 25 mM NaH<sub>2</sub>PO<sub>4</sub> given as the function of APTES concentration. Chronoamperometric measurements were conducted in the FIA system<sup>9</sup> at potential 0.2 V. A total flow rate was fixed at 3 mL min<sup>-1</sup>. Each assay was repeated three times. **(B)** Chronoamperometric curves for bare ITO and ITO modified with the optimal concentration of APTES (10<sup>-6</sup> mol L<sup>-1</sup>).
